# Supplementary material for: Efficacy of a new dietary supplement in dogs with advanced chronic kidney disease
Source: PeerJ. 2020 Aug 14;8:e9663. doi: 10.7717/peerj.9663 (PMC7430264; doi:10.7717/peerj.9663)
Supplement: Supplemental Information 1 [file peerj-08-9663-s001.xlsx]

## Sheet: treated group
paramethers	ranges			dog1									dog2									dog3									dog4								dog5								dog6
	min	max	measure	T0	T15	T30	T45	T60	T90	T120	T150	T180	T0	T15	T30	T60 (ex T45)	T60	T90	T120	T150	T180	T0	T15	T30	T45	T60	T90	T120	T150	T180	T0	T15	T30	T60	T90	T120	T150	T180	T0	T15	T30	T60	T90	T120	T150	T180	T0	T15	T30
Blood pressure	<95	<150	mm Hg	80/120	80/130	90/130	80/120	80/120	80/140	90/ 150	90/150	80/160	100/120	100/135		90/135		90/150	90/140	90/150	90/160	80/140	80/130	90/ 140	90/130	90/130	80/130	80/140	90/160	90/150	90/120	80/130	80/135	90/130	90/40	90/140	90/130	90/140	90/120	90/130	90/130	80/140	90/150	80/140	80/130	80/145	90/130	90/130	80/120
haematocrit (HCT)	37	55	%	36.8	31.6	32.8	33.6	33.6	30.2	29.4	31.2	28	22.6	23.7	24.8	24.9		21.3	22	24.5	27.2	48.7	44.4	42.6	40.3	40.3	33.2	36.2	40.3	41.6	33.2	34.2	32.8	33.9	33.4	30.1	31.6	35.9	52.3	50.1	51	48.2	49.2	47.3	48	47.4	25.2	27.3	28.9
haemoglobin (HG)	12	18	g/dl	13.6	13.9	14.4	14.9	14.9	12.1	11.8	12.3	11.4	8.9	8.3	9.9	10		8.2	8.8	9.7	10.8	16.7	15.5	14.3	13.1	13.1	10.7	11.2	38.3	39.2	11.6	11.7	11.5	11.7	11.7	12	12.5	13.7	19.8	18.4	18.5	17	17.5	16.4	16.5	16.8	10.1	10.6	11.4
red blood cells (RBC)	5.5	8.5	106 mm3	5.86	5.7	5.9	6.7	6.7	6.1	5.9	6.3	5.9	3.98	3.76	4.24	4.3		3.86	4.1	4.5	5.2	7.42	6.41	5.85	4.98	4.98	4.21	4.46	4.85	4.9	5.43	5.65	5.56	5.61	5.7	5.3	5.9	6.8	8.58	7.78	7.49	7.31	7.1	6.8	7	7.4	4.98	5.2	5.4
white blood cells (WBC)	6	17	103 mm3	13.5	12.2	12.7	10.6	10.6	11.9	9.8	11.5	14.6	3.7	4	6.4	9.2		8.5	11.8	10.7	9.5	7.1	8.6	6.7	5.4	5.4	6.5	7.5	6.8	6.1	11.5	13.5	13.8	6.7	4.5	6.2	8.3	8.6	9.6	10	9.2	10.3	9.1	11.8	9.6	11.1	19.6	17.5	12.5
neutrophil (N)	3	11.5	103 mm3	10.13	9.27	10.6	8.7	8.7	8.6	6.4	7.3	8.1	2.1	1.9	2.8	4.8		6.9	7.1	9.3	6.1	5.33	6.45	4.22	3.1	3.1	3.8	4.1	3.7	4.1	9.6	9.6	9.4	3.2	2.7	3.6	5.4	6	6.36	7.23	6.45	7.9	6.8	8.5	7.5	6.9	12.6	12.9	9.6
Band (neutrophil band)	0	0.3	103 mm3	0.27	0	0.1	0	0	0.1	0.2	0	2.8	0	0	0.2	0.3		0.4	0.1	0	0	0.28	0.17	0	0.1	0.1		0.2	0	0	0.3	0.4	0.6	0		0.1	0	0.09	0	0.2	0.34	0.1	0	0.2	0	0.09	2.1	1.8	0.6
eosinophil (EO)	0.1	1.3	103 mm3	0.68	0.73	0.8	1	1	1.1	1.4	1.8	1.5	0.4	1.1	0.4	0.6		0.9	1.2	0.9	1.1	0.43	0.34	0.4	0.3	0.3	0.8	1	1.2	1	1	1.35	1.4	1.1	1	1.3	1.6	1.4	0.67	1	1.4	1	1.2	1.8	1.1	1.4	1.9	1.3	1.1
basophil			103 mm3	0.14							0.1	0.1	0.1					o	0.1	0	0	0	0	0					0	0	0			0.09			0	0.09					0.09	0	0	0	0.09
lymphocytes (LYM)	1	4.8	103 mm3	1.35	0.98	1	0.9	0.9	1.2	1.4	2	2.1	1.1	1	3.3	3.1		2.3	3.1	1.7	1.1	0.21	1.12	0.54	0.9	0.9	1.5	2	1.7	1	0.4	1.5	2.1	1.8	1.6	0.8	1.1	1	2.21	2.67	0.8	0.8	0.7	1	1	1.8	1.8	1	0.9
platelets			103 mm3	308	292	300	287	287	251	334	367	300	445	439	385	400		624	576	430	362	333	335	407	390	390	378	419	374	400	127	155	172	153	125	237	200	224	186	211	243	336	478	440	395	330	76	126	212
Urine protein-to-creatinine (UPC)		0.5		0.7	0.67	0.67	0.68	0.68	0.67	0.72	0.69	0.73	0.5	0.58	0.51	0.53		0.72	0.68	0.59	0.55	1	0.9	0.9	0.9	0.9	0.9	0.9	0.9	0.9	0.4	0.5	0.5	0.6	0.57	0.6	0.68	0.65	0.66	0.67	0.65	0.65	0.66	0.63	0.59	0.59	0.47	0.44	0.43
urine protein (UP mg/dL)	0	150	mg/dl	445	405	387	400	400	367	405	390	400	456	440	376	334		420	415	370	345	332	387	375	389	389	345	378	335	315	234	247	235	300	287	320	375	340	198	176	200	178	200	190	175	18=	167	223	197
Urinary specific gravity (SG)	1020	1040		1010	1015	1015	1010	1010	1020	1020	1020	1015	1008	1010	1015	1020		1015	1015	1020	1020	1015	1015	1015	1010	1010	1015	1015	1020	1025	1015	1015	1015	1010	1015	1015	1015	1020	1020	1020	1020	1020	1020	1020	1025	1025	1025	1020	1025
blood urea nitrogen (BUN)	15	45	mg/dl	98	65.2	44	56	56	61.2	75.3	79.4	84.8	177	180	145	128		139	141	136	153	147	114	133	121	121	165	178	156	151	127	157	123	119	121	134	128	115	72.48	65.12	72.3	63.2	77.9	68.6	72	70.3	94.2	98.5	102.7
creatinine (CREA)	0.5	1.8	mg/dl	3.4	3.1	2.7	2.6	2.6	2.7	2.7	3.1	3.4	4.6	4.8	4.3	3.7		3.9	3.8	3.5	3.3	5.2	3.36	3.67	3.79	3.79	4.12	3.98	3.74	3.68	2.9	2.7	2.7	3.2	3.2	3.1	3.4	3.2	3.2	3.1	2.87	2.51	2.8	2.76	2.63	2.8	2.4	2.5	2.3
phosphorus (P)	2.7	5	mg/dl	10.7	8.7	5.3	4.4	4.4	4	3.8	3.7	3.7	9.7	5.3	4.1	3.56		3.6	3.55	3.32	3.28	8.9	5.9	4.3	3.9	3.9	3.2	3.1	3.2	3	9.3	5.2	3.3	2.9	3	3.1	3	3.2	7.2	4.67	3.81	3.7	3.4	3.4	3.3	3.4	6.4	4.3	4.1
total protein (TP)	6	7.5	mg/dl	5.7	6.2	6.2	6.3	6.3	6.9	6.4	6.3	6	5.2	5.4	5.8	6		5.7	5.5	6	6.3	6.49	6.58	6.64	6.5	6.5	6.3	6.1	6.4	6.7	8.4	7.5	7.4	6.5	6.3	6.1	6.4	6.4	7.9	7.86	8	7.65	6.98	6.76	6.99	7.1	11.2	10.3	9.4
albumin (ALB)	2.5	4.2	mg/dl	3.1	2.2	2.6	2.8	2.8	3.2	3	2.9	2.6	2	2.6	2.8	2.7		2.5	2.3	2.6	2.7	3.1	3.4	3.5	3.2	3.2	2.9	2.8	2.9	3.1	2.5	2.9	3.1	2.7	2.6	2.5	2.5	2.8	3.7	3.54	3.42	3.66	3.27	3.12	3.23	3.37	3.3	3.2	3.5
albumin/globulin (A/G)	0.5	1.3	mg/dl	0.6	0.5	0.7	0.7	0.7	1	1	1	0.8	0.6	0.5	0.6	0.7		0.8	0.8	0.9	0.8	1	1.1	1	1	1	1	1	1	0.9	0.4	0.6	0.7	0.9	0.9	0.9	0.7	0.8	1.1	1	0.9	1	0.9	0.9	0.9	1	0.4	0.4	0.5
glucose (GLU)	50	100	mg/dl	81	80	98	97	97	88	93	97	83	77	67	88	87		101	96	90	93	119	94	100	88	88	93	90	86	97	77	85	81	102	88	96	88	65	89.23	97.8	91.6	99	85	101	76	68	89	78	99
alanine aminotransferase (ALT)	7	40	UI/lt a 25° C	42	44	40	38	38	32	31	30	34	31	33	45	39		32	33	35	42	46	55	52	55	55	48	43	44	43	69	66	61	56	55	49	45	43	66.73	53.9	51.2	44.8	41.8	54	42	41	45.2	44.2	51.2
aspartate aminotransferase (AST)	7	40	UI/lt a 25° C	34	64	55	50	50	47	39	34	41	28	39	30	26		35	41	36	33	40	49	54	60	60	51	45	53	46	45	47	39	31	25	28	31	28	71.4	54.8	56.3	51.2	46.3	41	36	39	41	39.6	32.7
alkaline phosphatase (ALP)	5	110	UI/lt a 25° C	54	62	63	80	80	121	142	177	208	123	139	120	139		234	167	179	194	178	202	200	243	243	271	232	247	260	231	247	243	233	219	199	182	177	22.31	61.3	45.6	61.2	75	86.3	102	98	143	154	167.5
bilirubin (BIL)	0	0.7	mg/dl	0.11	0.12	0.12	0.1	0.1	0.12	0.1	0.15	0.12	0.2	0.2	0.2	0.18		0.2	0.21	0.16	0.2	0.23	0.19	0.19	0.16	0.16	0.14	0.14	0.12	0.14	0.09	0.09	0.1	0.14	0.12	0.1	0.1	0.12	0.86	0.75	0.71	0.55	0.42	0.48	0.44	0.41	0.9	0.9	0.76
cholesterol (CHOL)	140	240	mg/dl	299	169	188	176	176	150	178	187	216	342	331	343	349		405	397	357	327	317	337	340	367	367	342	354	339	318	447	440	421	400	438	398	404	380	174.3	165.7	224.8	325.6	310	432	414	440	276.9	287	323.5
Serum bicarbonate (HCO3)	18	24	mmol/l	16.8	16.7	16.2	16.8	16.8	16.8	17	17.1	17.3	17	17	17.3	17.8		17.7	17.6	17.6	17.5	16.4	16.7	16.8	17	17	17	17	17	17.1	16.4	16.8	17.1	17.3	17.4	17.4	17.3	17.2	16.8	17.2	17.5	17.7	17.6	17.5	17.5	17.7	15.9	16.5	16.7
ionized calcium (iCa)	1.29	1.41	mmol/l	1.26	1.34	1.35	1.34	1.34	1.33	1.34	1.33	1.33	1.28	1.29	1.33	1.38		1.39	1.39	1.39	1.39	1.3	1.35	1.36	1.37	1.37	1.39	1.39	1.38	1.38	1.24	1.32	1.37	1.37	1.37	1.38	1.37	1.35	1.26	1.29	1.29	1.29	1.3	1.32	1.32	1.33	1.18	1.23	1.26
body weight			kg	27.4	27.5	27.1	27.8	27.8	26	25.4	25	24.5	3.2	3	3.5	3.7		3.5	3.6	3.7	3.9	18.6	17.5	17.1	17.3	17.3	17	17.5	18	18	14.3	13.9	14	13.8	13.9	13.5	13.7	13.5	26	26.4	26.5	27	26.2	26.8	27	27	17.5	16.8	16.8
bcs (body condition score)	1	9		3	3	3	3	3	3	3	3	3	3	3	3	3		3	3	3	3	2	2	2	2	2	2	2	2	2	2	2	2	2	2	2	2	2	3	3	3	3	3	3	3	3	3	3	3
																						x
																						1	2	3	4	5	6	7
[truncated: 37 more columns]

## Sheet: control group
paramethers	ranges			dog11							dog12							dog13							dog14							dog15							dog16							dog17
	min	max	u.m.	T0	T30	T60	T90	T120	T150	T180	T0	T30	T60	T90	T120	T150	T180	T0	T30	T60	T90	T120	T150	T180	T0	T30	T60	T90	T120	T150	T180	T0	T30	T60	T90	T120	T150	T180	T0	T30	T60	T90	T120	T150	T180	T0	T30	T60	T90
Blood pressure	<95	<150	mm Hg		90/160	90/170	90/150	90/160		90/160	90/140	90/150	90/150	90/150		90/160					80/130	90/150	90/160	80/140		80/160	80/160	90/170	90/180	90/180			80/170	90/170	90/160	90/150	80/140	80/150	90/150	90/160	90/150	90/150	80/160		90/160	100/180	90/180	90/170	90/150
haematocrit (HCT)	37	55	%	31.3	33.1	29.3	30.4	28.2	27.6	27.4	32.4	30.5	27.4	28	30.6	31.8	30.4	29.5	27.6	28.7	29.1	31	29.8	28.7	29.7	28.1	26.5	25.8	26	24	24.8	21.6	19.7	20.6	22.3	21.7	22.8	20.8	39.8	37.3	38.4	35.5	36.9	36.2	33.8	23.4	21.4	21.9	21.3
haemoglobin (HG)	12	18	g/dl	12.8	13.2	12.2	12.8	12	11.4	11.2	14.7	13	11.2	11.1	12.8	14.4	12.1	13.1	12.5	13.3	13.6	14.5	14	13.3	12.7	12.4	11.7	11.8	11.7	10.4	10.3	9.6	9	9.9	10.3	10.5	11	9.8	15.7	15.5	15.9	13.8	13.9	13.5	11.9	11.2	10	10.5	10.2
red blood cells (RBC)	5.5	8.5	106 mm3	5.9	6.2	5.7	6	5.5	5.4	5.4	6.1	5.9	5	4.9	5.3	5.7	5.3	6.8	6.5	6.5	6.6	6.7	6.6	6.2	5.9	5.5	5.2	5.1	5.3	4.8	5	4.7	4.5	4.9	5.2	5.3	5.9	5.6	6.6	6.3	6.4	6.1	6.5	6.1	5.4	5.4	4.9	5.2	5.3
white blood cells (WBC)	6	17	103 mm3	7.9	8.8	8.3	9.1	8.6	8.4	6.3	14.8	18.4	10.5	10.3	11.2	10.3	9.9	12.6	12.7	10.8	9.6	10.1	8.7	8	8.9	9	11	8.8	7.9	7.4	7.8	8.4	7.2	8.3	8.1	9.5	8.5	8.1	6.4	7.4	6.9	7.7	12.7	9.9	9.2	19.3	23.6	18.9	13.8
neutrophil (N)	3	11.5	103 mm3	4.9	5.3	5.7	6.9	6.1	5.8	4.1	10.2	14.1	7.2	6.5	7.6	6.6	6.4	8.9	9.4	7.8	7.2	6.9	5.9	5.3	5.8	6.1	7.9	6.5	5.7	5.3	5.4	5.8	5.1	6.1	5.3	5.5	5.8	5.5	4.8	4.6	4.7	4.9	8.8	6.8	5.7	13.2	15.7	13.7	7.8
Band (neutrophil band)	0	0.3	103 mm3	0	0	0	0.1	0	0.1	0	0.6	1	0.3	0.1	0	0.1	0	0	0	0.1	0	0.1	0.2	0	0.1	0	0.4	0	0	0.1	0	0	0	0.1	0	0.1	0	0	0	0	0	0	0.6	0.2	0.09	1.2	0.8	0.4	0.4
eosinophil (EO)	0.1	1.3	103 mm3	0.8	1.1	0.9	0.8	0.7	0.7	0.6	1.7	1.1	1.1	1	1.1	0.9	1.1	0.6	1	1.1	0.9	1	1	0.8	0.5	0.7	0.7	0.6	0.6	0.5	0.9	0.8	0.7	0.9	0.9	1.6	1.1	1.2	0.7	0.9	0.8	0.7	1	0.9	1	1.7	2.2	1.6	1.8
basophil			103 mm3	0	0.1	0.1	0	0.1	0.1	0.1	0	0.1	0	0.1	0.1	0.1	0.1	0.1	0.1	0	0	0	0.1	0	0	0.1	0.1	0.1	0.1	0	0.1	0.1	0	0	0.1	0.2	0	0	0.1	0.2	0.1	0.1	0	0	0	0	0.2	0	0.2
lymphocytes (LYM)	1	4.8	103 mm3	1	1.3	0.8	1.3	1	1.1	0.8	1.3	1.1	1.1	1.4	1.2	1.3	1.3	1.5	1.4	1.4	1	1.4	1	1.3	1.2	1.1	1	0.9	0.9	0.8	0.6	0.5	0.8	1.1	1.1	1.4	1	0.9	0.5	1	0.8	1.3	1.6	1.3	1.6	1.6	2.8	2	2.3
platelets			103 mm3	334	310	340	317	290	339	388	154	88	133	148	138	149	153	235	186	132	180	166	145	180	468	443	417	367	300	357	349	43	166	144	197	180	166	192	447	502	557	488	455	480	441	117	95	166	190
Urine protein-to-creatinine (UPC)		0.5		0.7	0.7	0.7	0.7			0.8	0.8	0.9	0.9			0.8	1	0.6	0.8		0.8	0.8	0.9	0.9		0.6	0.65		0.73	0.81	1	0.7	0.7	0.8	0.8	0.9	1	0.9	0.6	0.7	0.7	0.9	1	0.9	1.2	0.8	0.8	0.8	0.7
urine protein (UP mg/dL)	0	150	mg/dl	180	200	190	215			230	145	160	155			145	160	180	225		230	230	245	135		250	290		335	330	340	335	330	320	310	345	330	320	200	210	215	255	240	255	280	335	400	375	330
Urinary specific gravity (SG)	1020	1040		1020	1020	1020	1015			1015	1020	1015	1015			1015	1015	1020	1020		1015	1010	1010	1015		1015	1010		1010	1010	1015	1010	1010	1010	1015	1010	1010	1015	1015	1010	1010	1015	1010	1010	1015	1010	1010	1020	1015
blood urea nitrogen (BUN)	15	45	mg/dl	128	113	120	127	137	155	179	144	156	160	154	167	158	175	94	100	107	98	104	112	123	129	117	144	169	150	173	160	165	147	155	141	132	144	141	102	124	120	134	132	141	139	217	182	155	170
creatinine (CREA)	0.5	1.8	mg/dl	2.7	2.5	2.6	2.7	3	3.3	3.5	3.6	3.9	3.6	3.8	3.5	3.3	3.4	2.4	2.7	2.6	2.9	2.8	3.1	3.3	3.1	3.3	3.5	3.8	3.7	3.8	3.9	4.1	3.6	3.8	3.5	3.4	3.3	3.5	2.9	3.2	3.3	3.5	3.7	4	4.2	4.3	3.8	3.7	3.8
phosphorus (P)	2.7	5	mg/dl	7.8	7.4	7.8	7.7	7.9	8.2	8.4	7.9	8.5	8.2	8.3	8.1	7.8	7.9	7.4	7.8	7.4	7.9	7.8	8.3	8.1	6.8	7.3	7.8	7.9	7.8	8	7.9	7.9	7.1	7.7	7.2	7.4	7.8	8.3	8.9	8.7	8.7	8.6	8.9	9.3	8.9	10.7	9.5	9.6	8.8
total protein (TP)	6	7.5	mg/dl	6.4	6.2	6.5	6.4	6.5	6.3	6.1	11.3	10.1	9.2	8.7	8.8	8.9	8	7.4	7.7	7.3	7.1	6.9	6.4	6.7	8.4	7.6	7.2	6.8	6.5	6.3	6.1	6	6.5	6.4	6.5	6.8	6.4	6.2	5.9	5.8	6	5.9	5.7	6	5.9	11.8	11.4	10.6	10.4
albumin (ALB)	2.5	4.2	mg/dl	3	2.9	2.9	3	2.9	2.9	2.9	3.3	2.9	3	3.1	2.9	2.9	2.6	3.5	3.4	3.3	3.1	3	2.9	3	3.6	3.2	3	3.1	2.9	2.9	2.8	3.2	3.4	3.3	3.3	3.4	3.2	3	2.8	2.7	2.8	3	2.9	2.9	2.7	2.9	3.2	3.2	3.3
albumin/globulin (A/G)	0.5	1.3	mg/dl	0.9	1	0.9	1	0.9	1	1	0.4	0.5	0.5	0.6	0.6	0.6	0.6	0.9	1	1	1.1	1.1	1	1	0.8	0.9	0.9	0.9	0.9	1	1	1	1	1	1.1	1.1	1	1	1	1	1	1	1	1	1	0.3	0.4	0.4	0.5
glucose (GLU)	50	100	mg/dl	86	100	84	78	102	82	80	76	96	87	73	99	86	102	108	97	104	87	98	90	94	105	88	100	73	95	99	106	67	81	86	90	83	90	88	67	71	77	69	86	72	80	62	74	81	77
alanine aminotransferase (ALT)	7	40	UI/lt a 25° C	43	41	39	32	34	30	28	21	34	33	32	30	28	24	55	50	44	47	46	44	43	66	59	65	61	57	58	48	23	28	24	23	21	25	23	101	98	107	92	105	119	102	210	160	149	133
aspartate aminotransferase (AST)	7	40	UI/lt a 25° C	32	36	32	29	31	29	27	48	65	61	54	46	44	47	33	41	32	36	34	31	37	34	31	34	33	29	31	33	19	22	28	33	29	27	25	59	65	66	49	44	42	39	88	78	65	71
alkaline phosphatase (ALP)	5	110	UI/lt a 25° C	121	98	105	99	109	103	94	169	227	230	225	238	226	240	187	186	197	185	192	189	193	189	206	274	301	337	373	386	98	102	104	98	110	105	100	341	301	296	304	300	283	244	288	319	334	310
bilirubin (BIL)	0	0.7	mg/dl	0.1	0.1	0.1	0.1	0.1	0.1	0.1	0.33	0.4	0.4	0.3	0.32	0.33	0.4	0.22	0.17	0.13	0.15	0.15	0.16	0.15	0.1	0.1	0.14	0.1	0.13	0.1	0.11	0.1	0.1	0.11	0.1	0.12	0.13	0.11	0.1	0.1	0.1	0.15	0.1	0.2	0.2	0.32	0.31	0.27	0.24
cholesterol (CHOL)	140	240	mg/dl	433	452	440	431	436	429	480	410	375	381	419	390	409	380	386	350	334	329	400	386	365	332	375	340	339	364	412	442	338	380	350	366	358	346	334	337	500	487	448	537	480	485	456	440	495	483
Serum bicarbonate (HCO3)	18	24	mmol/l	17.4	17.4	17.1	17	16.8	16.7		16	15.9	16	16		15.9	15.8	19.7	19.6	18.6	18.9	18.3	17.8	17.4		15.9	15.7	15.8	15.7		15.8		17.3	17.4	17.2	17.2	17.1	17	16.1	15.9	15.8	15.9	15.8	15.9	15.8	16.4	16.3	16.1	16.2
ionized calcium (iCa)	1.29	1.41	mmol/l	1.31	1.29	1.31	1.3	1.29	1.28	1.29	1.19	1.19	1.18	1.2	1.19	1.2	1.18	1.34	1.33	1.33	1.31	1.32	1.3	1.31	1.18	1.19	1.18	1.18	1.17	1.18	1.17	1.28	1.31	1.3	1.31	1.29	1.27	1.28	1.32	1.31	1.29	1.28	1.26	1.27	1.27	1.25	1.26	1.26	1.27
body weight			kg	13	13.5	14	14	13.5	13	12	44	42	40.5	41	41.5	41.5	41	5.6	5.5	5.2	5	4.8	4.4	4.3	31	30	28.5	28	26.5	27	27	19.5	19.5	18	18	18.5	18.5	18	27	26	26.5	25.5	24	24	23.5	21	19.5	19.5	20
bcs (body condition score)	1	9		2	3	3	3	3	2	2	3	3	2	2	2	2	2	3	3	3	3	2	2	2	3	3	2	2	2	2	2	3	3	3	3	3	3	2	2	2	2	2	2	2	2	2	2	2	2
[truncated: 24 more columns]
